# Supplementary material for: A mechanism of post-depositional processes affecting chlorine and its isotope in the upper snowpack of High Antarctic Plateau
Source: Copernicus journal article supplement (doi:10.5194/egusphere-2022-1455), 2023-01-04
Supplement: Supplementary file 1 [file egusphere-2022-1455-supplement.pdf]

Fig. S1

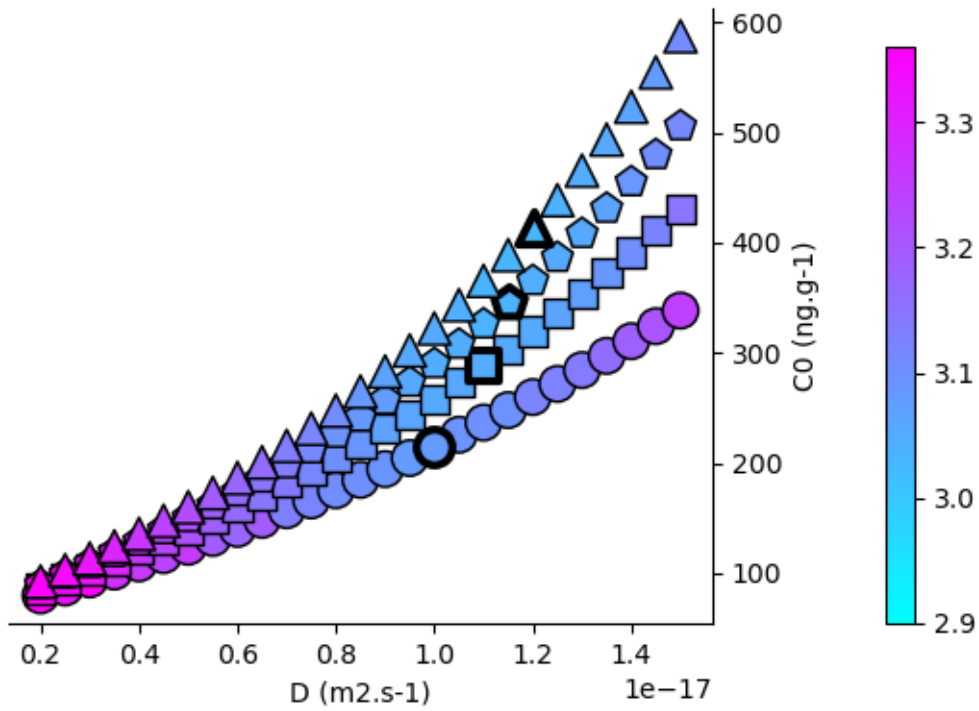

**Figure S1:** Logarithmic of RMSD value between model result and data (color scale) as a function of the diffusion coefficient  $D$  and the initial concentration in snow grain  $C_0$ . The time lag is represented by the symbols: circle (no time lag), squares (4 months), pentagons (8 months) and triangles (12 months).
